# Supplementary material
Source: PubMed Central journal article supplement (PMC2735825)

**A**

Ant-TASK-1 (sc-11309)    Ant-TASK-3 (sc-11317)    Anti-TWIK-1 (sc-11481)    Anti-TREK-1 (sc-11556)    Anti-TREK-2 (sc-11559)

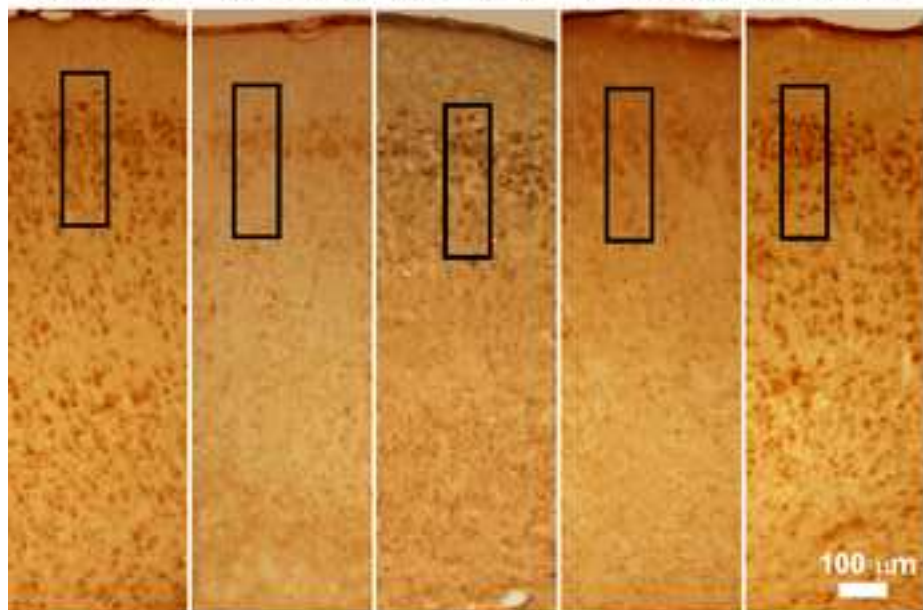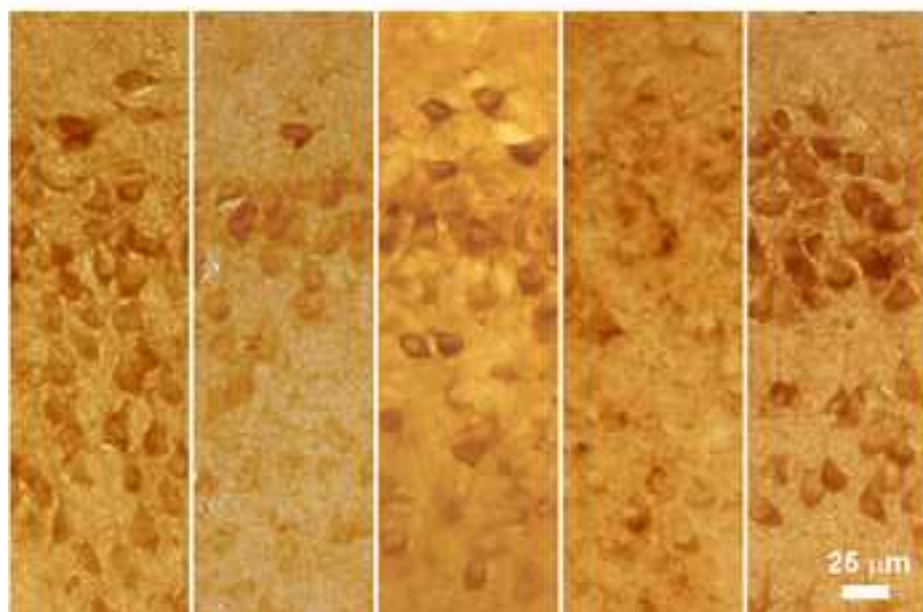

**B**

+ Corresponding blocking peptides

Anti-TASK-1 (sc-32067)    Anti-TASK-3 (sc-11322)    Anti-TWIK-1 (sc-11483)    Anti-TREK-1 (sc-11554)    Anti-TREK-2 (sc-11560)

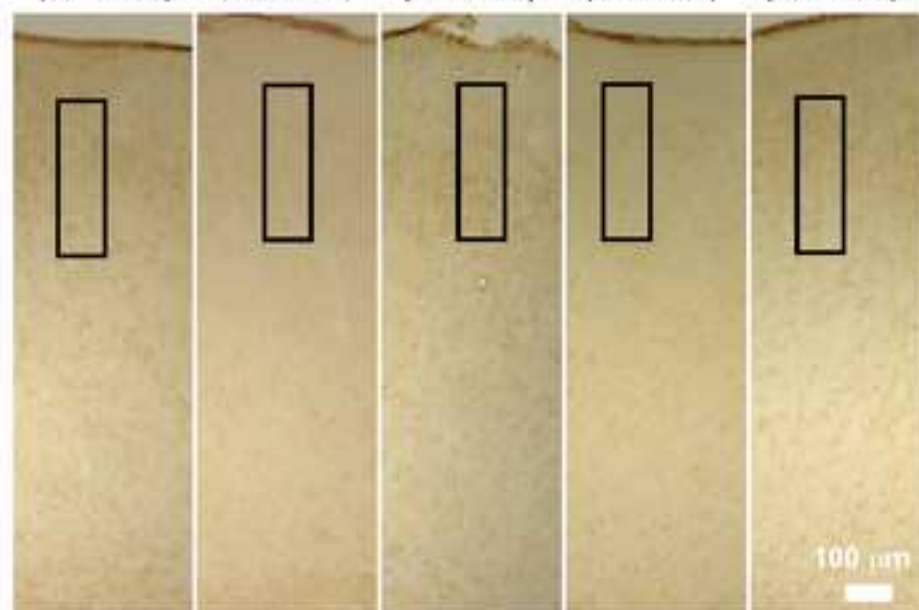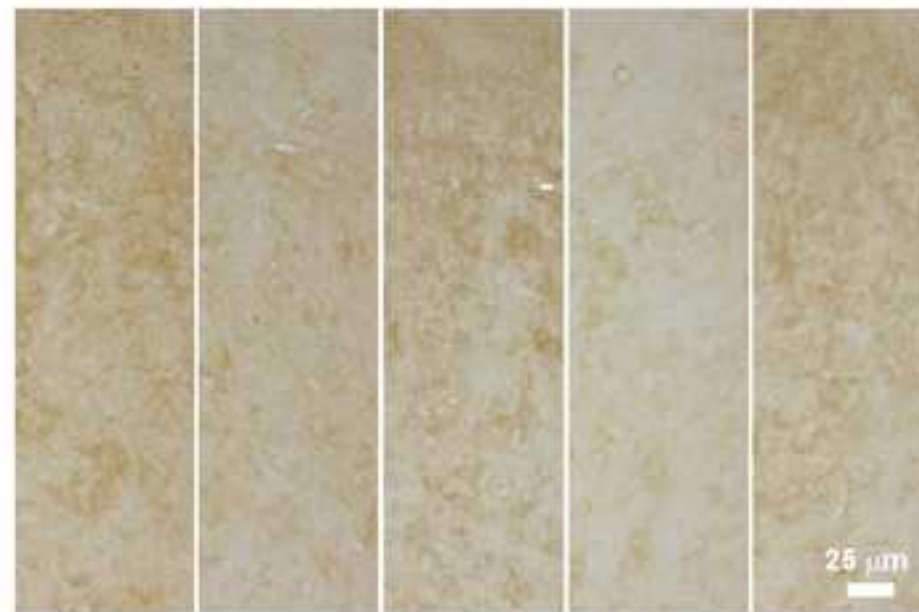

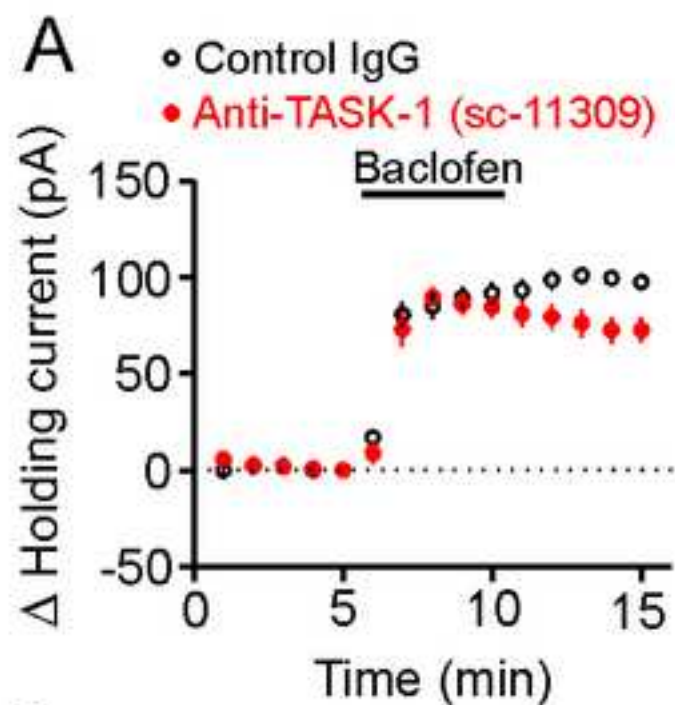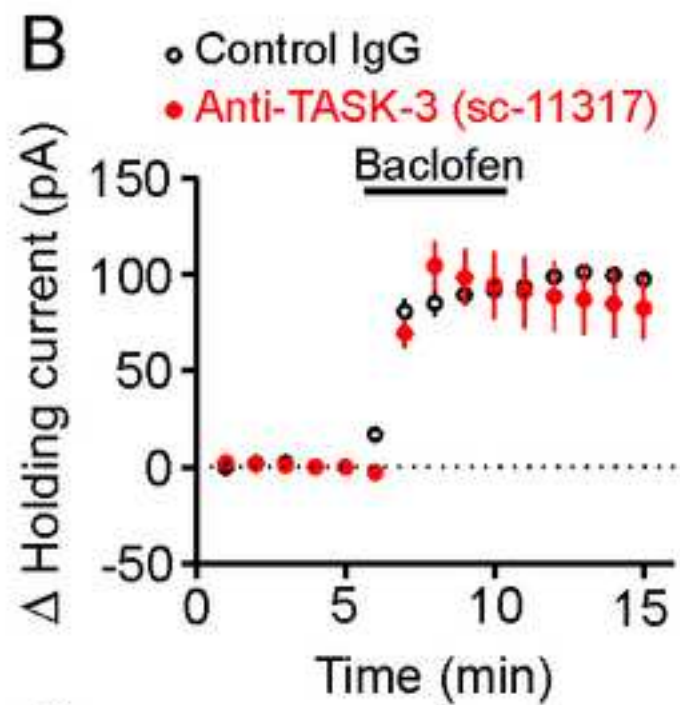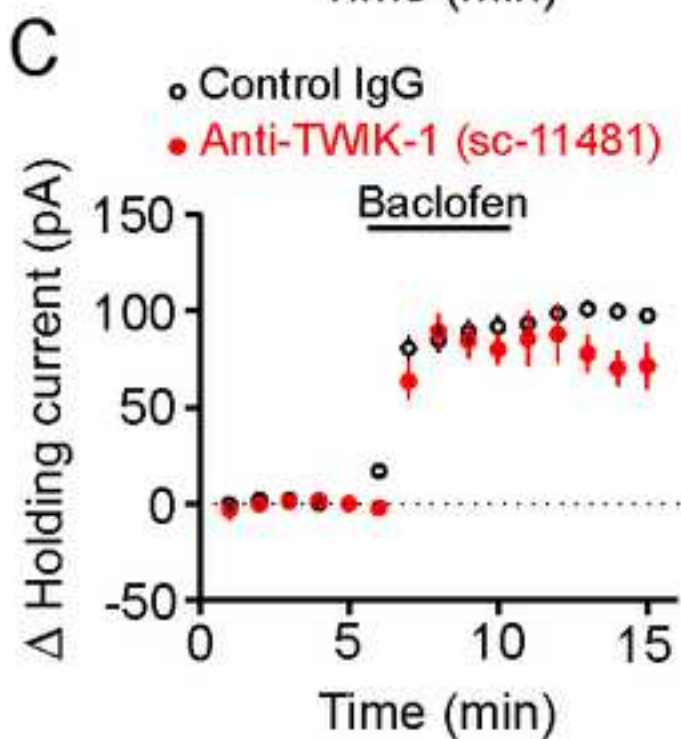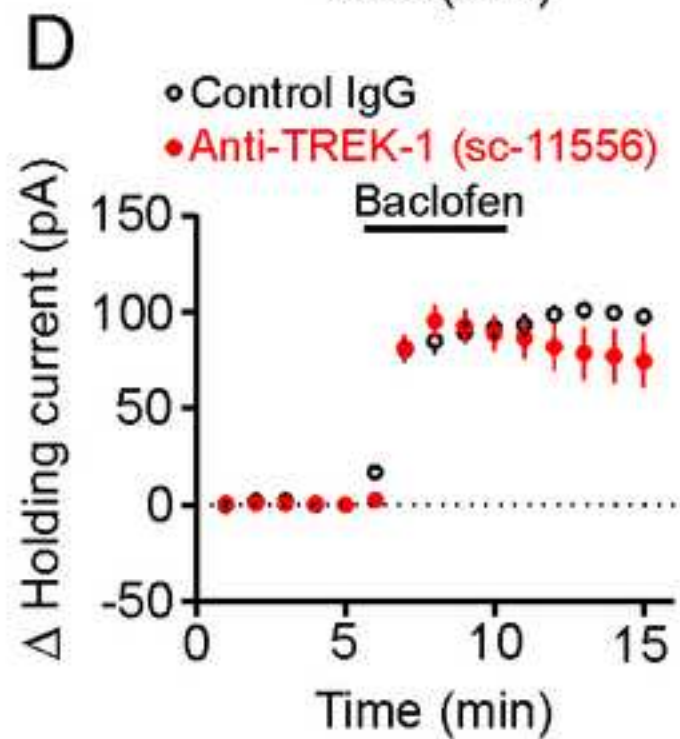



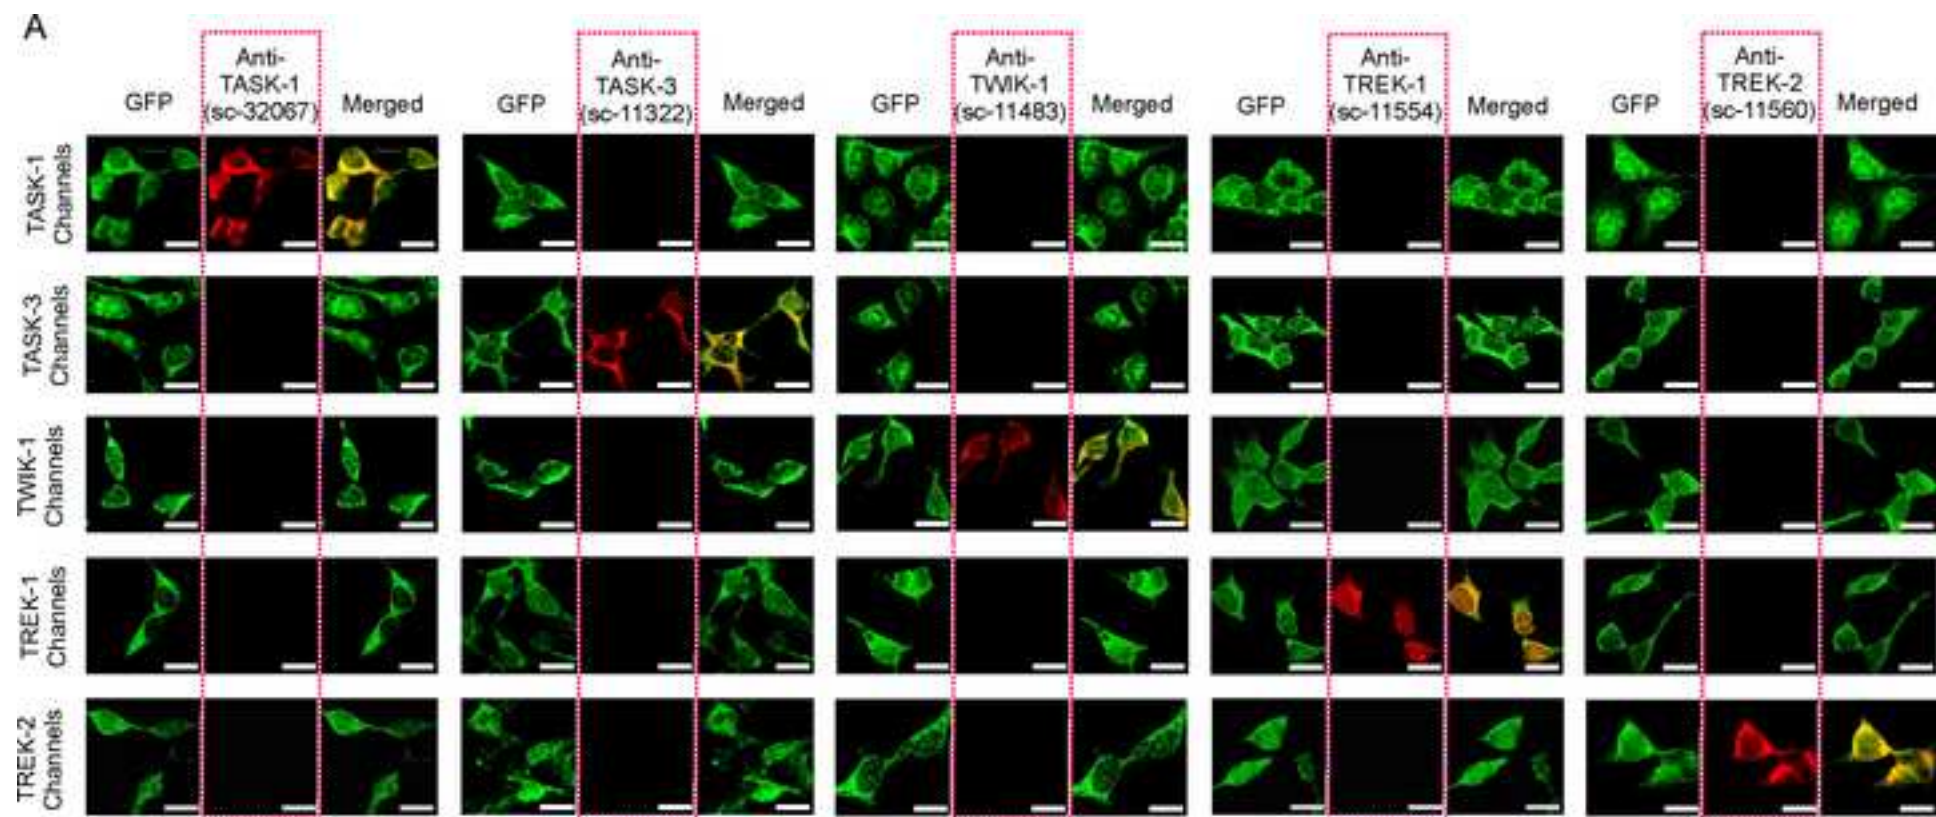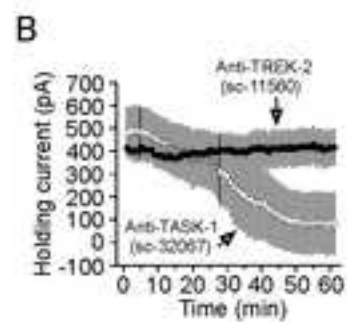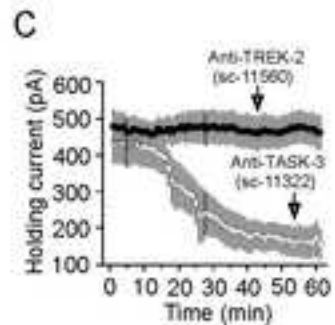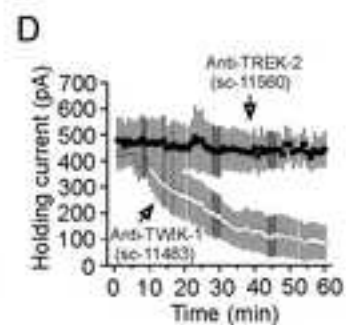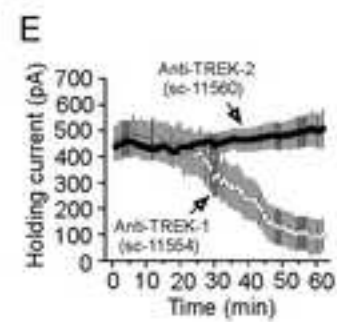

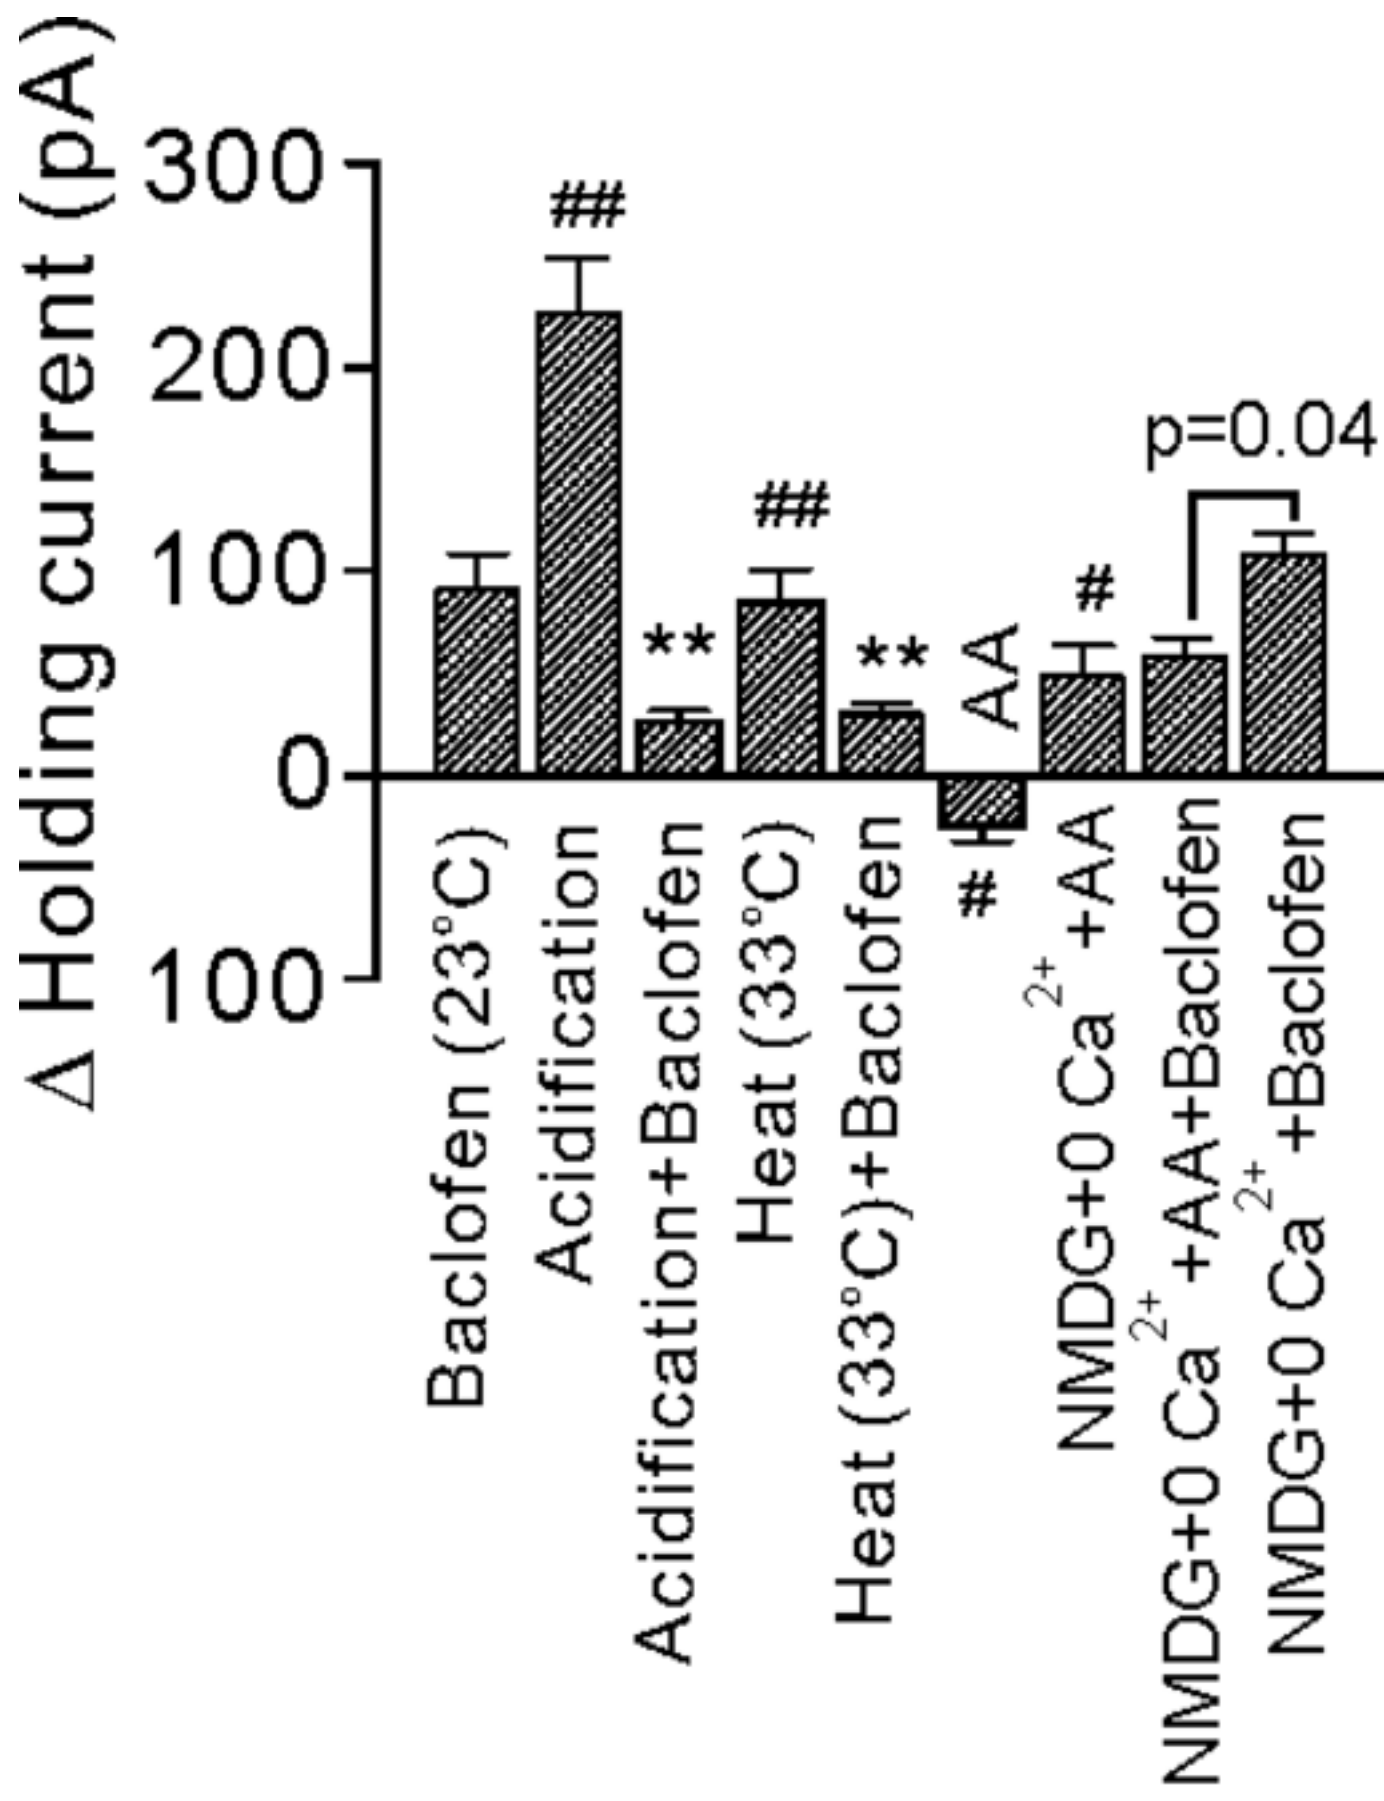

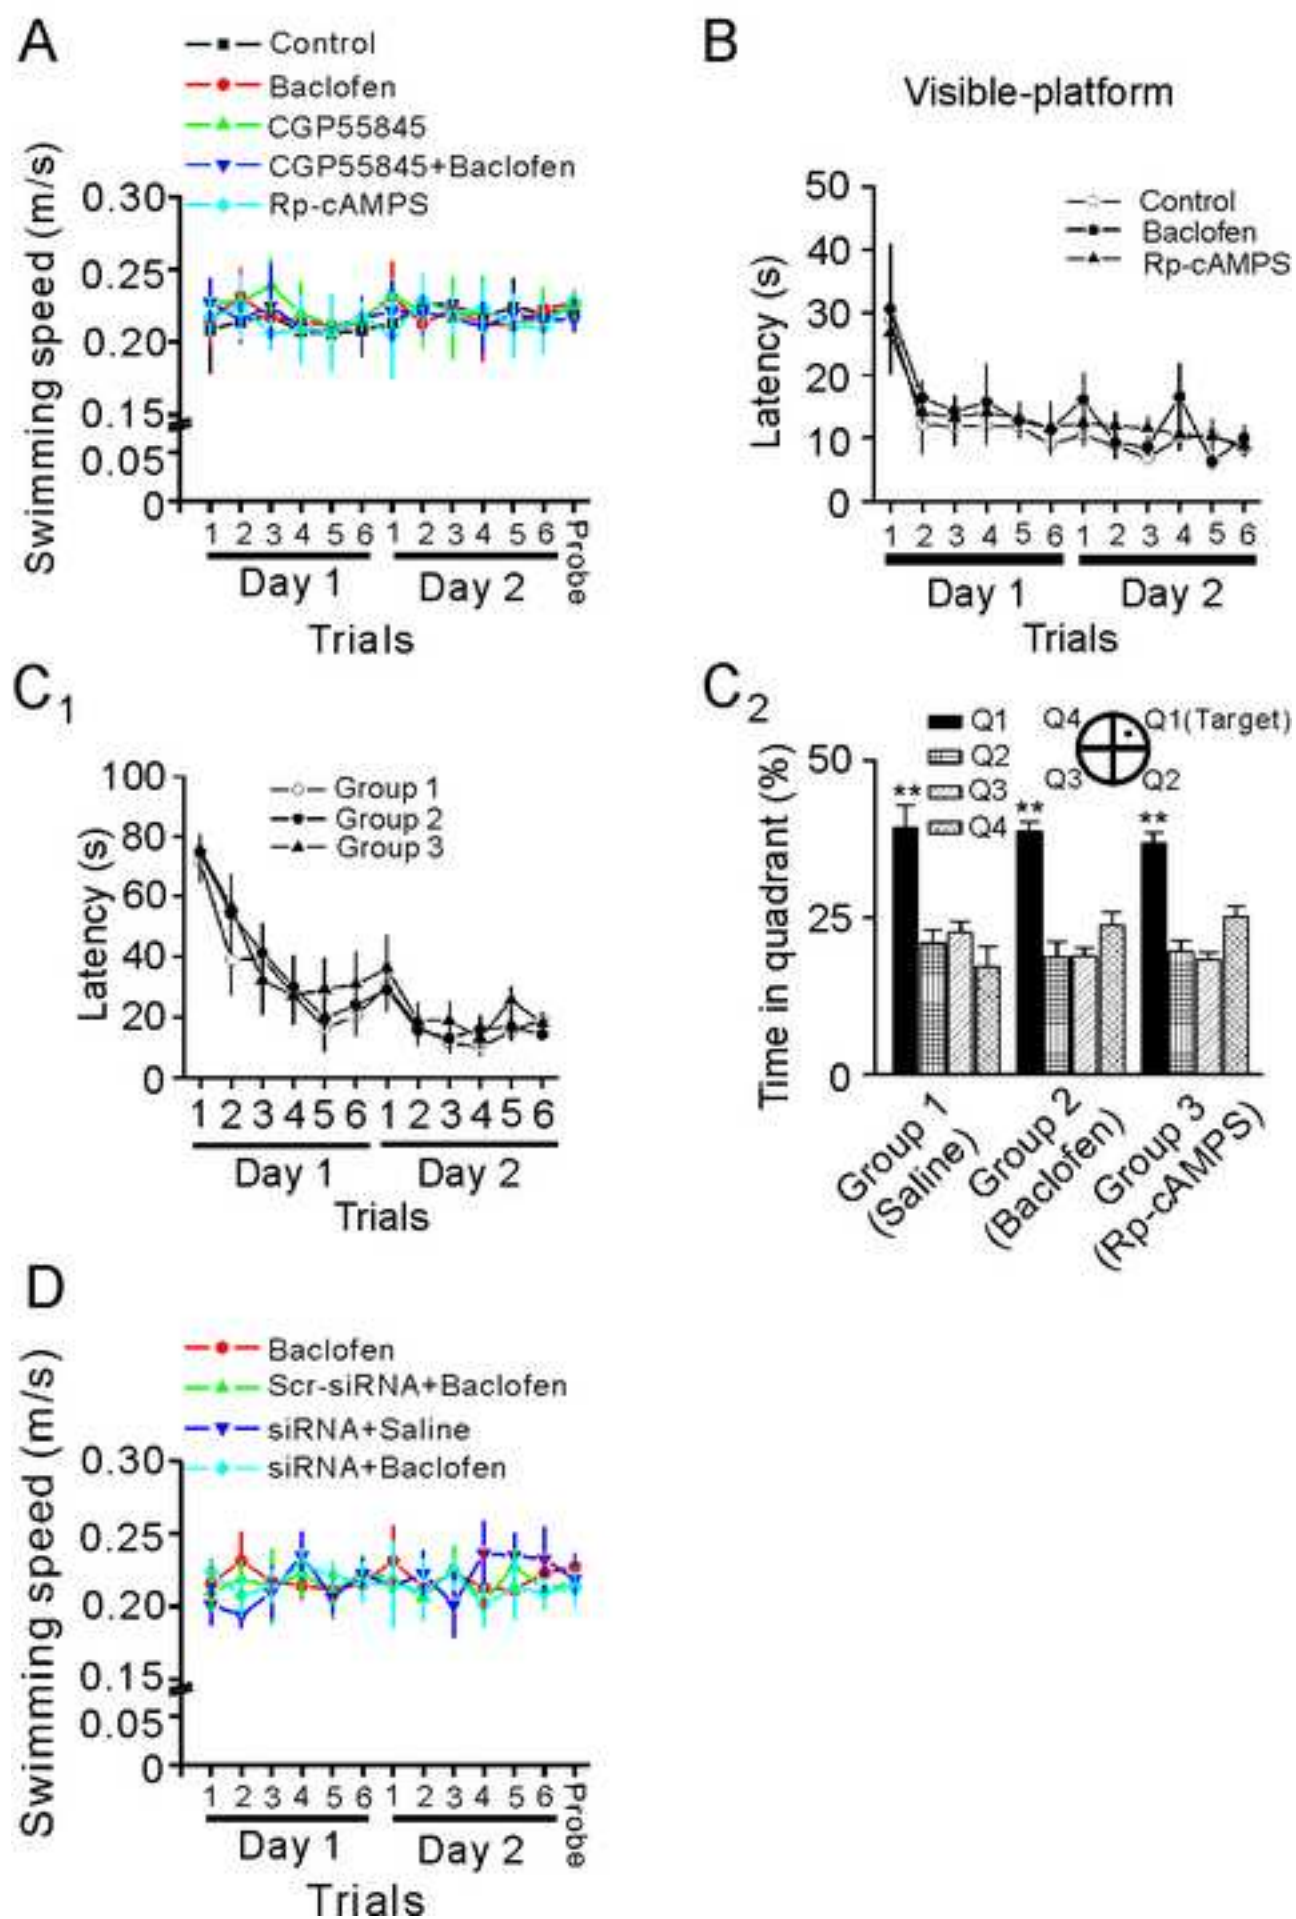



Scr-siRNA

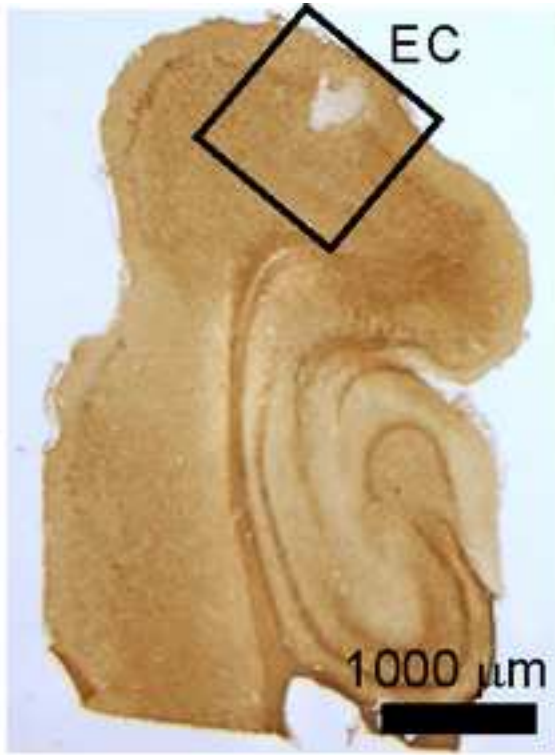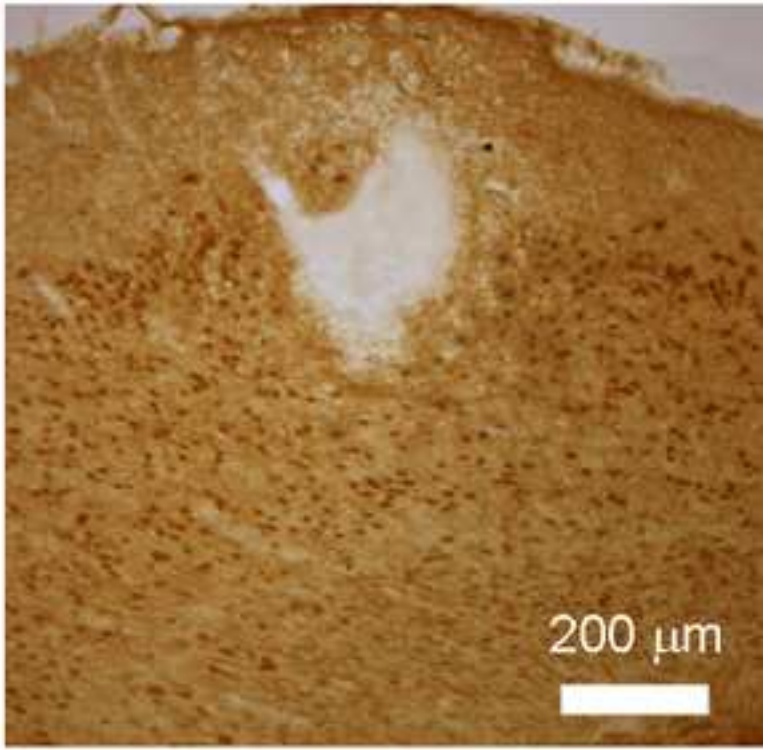

siRNA

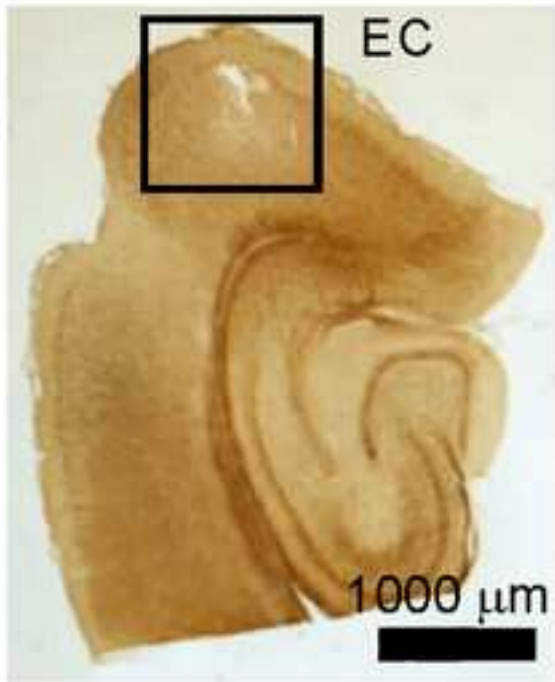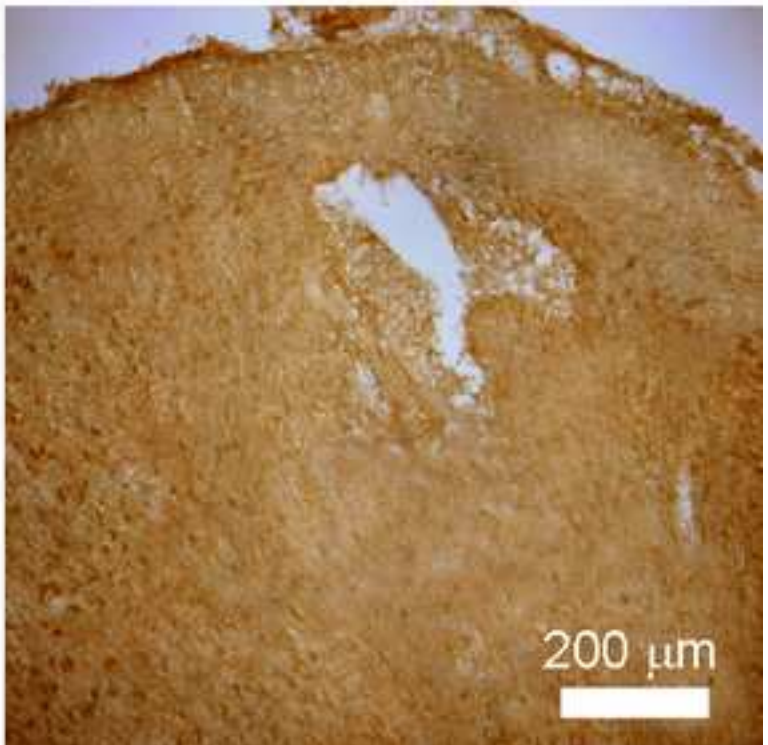

Supplement: NIHMS133397-supplement-01.pdf [file NIHMS133397-supplement-01.pdf]
